# Supplementary material for: Possible correlation of apical localization of MUC1 glycoprotein with luminal A-like status of breast cancer
Source: PubMed Central journal article supplement (PMC10066179; doi:10.1038/s41598-023-32579-4), 2023-03-31
Supplement: 41598_2023_32579_MOESM2_ESM.pdf [file 41598_2023_32579_MOESM2_ESM.pdf]

**Supplementary Table 1** Clinicopathological features of the three cohorts examined

**(A)** Multi-gene assay (MGA)-cohort

| Variable                  |                  | MGA-cohort<br>(n = 51) |         |
|---------------------------|------------------|------------------------|---------|
| Age, mean [range], y      |                  | 52.0                   | [31-76] |
| Histology                 | NST              | 45                     | (88)    |
|                           | Others -         | 6                      | (12)    |
|                           | ILC              | 3                      |         |
|                           | IMPC             | 2                      |         |
|                           | ICC              | 1                      |         |
| pT, mean [range], mm      |                  | 25.0                   | [8-75]  |
| pN                        | Positive         | 25                     | (49)    |
|                           | Negative         | 26                     | (51)    |
| pStage                    | I                | 17                     | (33)    |
|                           | II               | 31                     | (61)    |
|                           | III              | 3                      | (6)     |
| Tumour grade              | High             | 9                      | (18)    |
|                           | Intermediate/low | 42                     | (82)    |
| Ki67 L.I., mean [range],% |                  | 39.2                   | [5-80]  |
| ER                        | Positive         | 51                     | (100)   |
|                           | Negative         | 0                      | (0)     |
| PgR                       | Positive         | 51                     | (100)   |
|                           | Negative         | 0                      | (0)     |

Values are n (%) unless otherwise indicated.

*NST* no special type, *ILC* invasive lobular carcinoma, *IMPC* invasive micropapillary carcinoma, *ICC* invasive cribriform carcinoma, L.I. labelling index, ER estrogen receptor, PgR progesterone receptor

**(B) Neoadjuvant chemotherapy (NAC)-cohort**

| Variable                  |                  | NAC-cohort<br>(n = 96) |         |
|---------------------------|------------------|------------------------|---------|
| Age, mean [range], y      |                  | 51.8                   | [22-78] |
| Histology                 | NST              | 92                     | (96)    |
|                           | Others -         | 4                      | (4)     |
|                           | ILC              | 4                      |         |
| ypT, mean [range], mm     |                  | 28.7                   | [0-110] |
| ypN                       | Positive         | 61                     | (64)    |
|                           | Negative         | 35                     | (36)    |
| ypStage                   | 0                | 5                      | (5)     |
|                           | I                | 17                     | (18)    |
|                           | II               | 50                     | (52)    |
|                           | III              | 24                     | (25)    |
| Tumour grade              | High             | 10                     | (10)    |
|                           | Intermediate/low | 85                     | (89)    |
|                           | Unknown          | 1                      | (1)     |
| Ki67 L.I., mean [range],% |                  | 24.8                   | [2-90]  |
| ER                        | Positive         | 96                     | (100)   |
|                           | Negative         | 0                      | (0)     |
| PgR                       | Positive         | 69                     | (72)    |
|                           | Negative         | 26                     | (27)    |
|                           | Unknown          | 1                      | (1)     |
| NAC regimen               | A+T              | 90                     | (94)    |
|                           | A alone          | 5                      | (5)     |
|                           | T alone          | 1                      | (1)     |

Values are n (%) unless otherwise indicated.

*NST* no special type, *ILC* invasive lobular carcinoma, *L.I.* labelling index, *ER* estrogen receptor, *PgR* progesterone receptor, *A* anthracycline, *T* taxane

(C) Tissue microarray (TMA)-cohort

| Variable                  |                  | TMA-cohort<br>(n = 609) |         |
|---------------------------|------------------|-------------------------|---------|
| Age, mean [range], y      |                  | 56.3                    | [28-93] |
| Histology                 | NST              | 507                     | (83.2)  |
|                           | Others -         | 102                     | (16.8)  |
|                           | ILC              | 52                      |         |
|                           | Mucinous         | 31                      |         |
|                           | IMPC             | 7                       |         |
|                           | ICC              | 4                       |         |
|                           | Tubular          | 4                       |         |
|                           | Apocrine         | 2                       |         |
|                           | Medullary        | 1                       |         |
|                           | Squamous         | 1                       |         |
| pT, mean [range], mm      |                  | 27.6                    | [2-139] |
| pN                        | Positive         | 232                     | (38)    |
|                           | Negative         | 333                     | (55)    |
|                           | Not evaluated    | 44                      | (7)     |
| pStage                    | I                | 186                     | (31)    |
|                           | II               | 355                     | (58)    |
|                           | III              | 68                      | (11)    |
| Tumour grade              | High             | 72                      | (12)    |
|                           | Intermediate/low | 494                     | (81)    |
|                           | Not evaluated    | 43                      | (7)     |
| Ki67 L.I., mean [range],% |                  | 32.8                    | [0-100] |
| ER                        | Positive         | 605                     | (99)    |
|                           | Negative         | 4                       | (1)     |
| PgR                       | Positive         | 556                     | (91)    |
|                           | Negative         | 53                      | (9)     |
| Adjuvant chemotherapy     | Yes              | 205                     | (34)    |
|                           | No               | 404                     | (66)    |

*NST* no special type, *ILC* invasive lobular carcinoma, *IMPC* invasive micropapillary carcinoma, *ICC* invasive cribriform carcinoma, L.I. labelling index, ER estrogen receptor, PgR progesterone receptor
