# Supplementary material for: Possible correlation of apical localization of MUC1 glycoprotein with luminal A-like status of breast cancer
Source: PubMed Central journal article supplement (PMC10066179; doi:10.1038/s41598-023-32579-4), 2023-03-31
Supplement: 41598_2023_32579_MOESM3_ESM.pdf [file 41598_2023_32579_MOESM3_ESM.pdf]

Supplementary Table 2 Relationship between MUC1 staining pattern and clinicopathological features in the NAC-cohort (n = 98)

| Variables         | MUC1 staining    |        | P-value |
|-------------------|------------------|--------|---------|
|                   | Ap               | Others |         |
| Age, mean, y      | 50.6             | 51.8   | 0.723   |
| Histology         | NST              | 7      | 0.567   |
|                   | Others           | 0      |         |
| ypT, mean, mm     | 15.3             | 29.8   | < 0.001 |
| ypN               | Positive         | 5      | 0.653   |
|                   | Negative         | 2      |         |
| Tumour grade      | High             | 2      | 0.106   |
|                   | Intermediate/low | 5      |         |
| Ki67 L.I., mean,% | 23.6             | 24.8   | 0.841   |
| PgR               | Positive         | 5      | 0.941   |
|                   | Negative         | 2      |         |

*MUC1* mucin 1, *NAC* neoadjuvant chemotherapy, *Ap* apical, *NST* no special type, *L.I.* labelling index, *PgR* progesterone receptor

\*All were invasive lobular carcinoma
