# Supplementary material for: Possible correlation of apical localization of MUC1 glycoprotein with luminal A-like status of breast cancer
Source: PubMed Central journal article supplement (PMC10066179; doi:10.1038/s41598-023-32579-4), 2023-03-31
Supplement: 41598_2023_32579_MOESM4_ESM.pdf [file 41598_2023_32579_MOESM4_ESM.pdf]

**Supplementary Table 3** Relationships between patient outcomes and clinicopathological features in the NAC-cohort

**Disease-free survival**

| Variables     |                       | Univariate |             |         | Multivariate |            |         |
|---------------|-----------------------|------------|-------------|---------|--------------|------------|---------|
|               |                       | HR         | 95% CI      | P-value | HR           | 95% CI     | P-value |
| Age           |                       | 0.14       | 0.02-1.04   | 0.055   | 0.09         | 0.01-0.80  | 0.031   |
| Chemo-effect  | pCR vs. non-pCR       | 1.88E-09   | 1.29-1.29   | 0.083   |              |            |         |
| ypT (mm)      |                       | 20.32      | 2.79-113.88 | 0.004   | 12.93        | 1.68-83.97 | 0.016   |
| ypN           | Positive vs. negative | 2.04       | 0.88-5.56   | 0.102   | 1.59         | 0.63-4.56  | 0.338   |
| Histology     |                       | 5.46E+08   | 0.87-0.87   | 0.066   |              |            |         |
| Tumour grade  |                       | 0.94       | 0.22-2.72   | 0.919   |              |            |         |
| Ki67 L.I.     |                       | 0.80       | 0.10-4.58   | 0.819   | 1.34         | 0.15-9.20  | 0.784   |
| PgR           | Positive vs. negative | 0.61       | 0.28-1.38   | 0.223   | 0.38         | 0.17-0.91  | 0.031   |
| MUC1 staining |                       | 0.39       | 0.02-1.88   | 0.290   | 0.45         | 0.02-2.23  | 0.386   |

**Overall survival (breast cancer-related)**

| Variables     |                       | Univariate |             |         | Multivariate |             |         |
|---------------|-----------------------|------------|-------------|---------|--------------|-------------|---------|
|               |                       | HR         | 95% CI      | P-value | HR           | 95% CI      | P-value |
| Age           |                       | 0.11       | 0.01-1.51   | 0.100   | 0.07         | 0.004-1.23  | 0.069   |
| Chemo-effect  | pCR vs. non-pCR       | 5.10E-09   | 2.17-2.17   | 0.176   |              |             |         |
| ypT (mm)      |                       | 20.65      | 2.60-127.57 | 0.006   | 14.43        | 1.52-124.18 | 0.021   |
| ypN           | Positive vs. negative | 2.55       | 0.83-11.06  | 0.107   | 2.13         | 0.55-11.39  | 0.286   |
| Histology     |                       | 5.46E+08   | 0.54-0.54   | 0.143   |              |             |         |
| Tumour grade  |                       | 0.63       | 0.20-2.75   | 0.489   |              |             |         |
| Ki67 L.I.     |                       | 1.66       | 0.16-11.10  | 0.644   | 5.43         | 0.37-64.84  | 0.206   |
| PgR           | Positive vs. negative | 0.50       | 0.19-1.38   | 0.174   | 0.27         | 0.09-0.80   | 0.019   |
| MUC1 staining |                       | 1.64E-09   | 1.09-1.09   | 0.060   | 1.53E-10     | 0.00-1.60   | 0.113   |

All biomarkers were assessed based on biopsy specimens

NAC neoadjuvant chemotherapy, pCR pathological complete response, NST no special type, L.I. labelling index, HR hazard ratio, CI confidence interval, PgR progesterone receptor, MUC1 mucin 1, Ap apical
