# Supplementary material for: Possible correlation of apical localization of MUC1 glycoprotein with luminal A-like status of breast cancer
Source: PubMed Central journal article supplement (PMC10066179; doi:10.1038/s41598-023-32579-4), 2023-03-31
Supplement: 41598_2023_32579_MOESM5_ESM.pdf [file 41598_2023_32579_MOESM5_ESM.pdf]

Supplementary Table 4 Relationship between MUC1 staining pattern and clinicopathological features in the TMA-cohort (n = 609)

| Variables             | MUC1 staining    |        | P-value |
|-----------------------|------------------|--------|---------|
|                       | Ap               | Others |         |
| Age, mean, y          | 52.7             | 56.7   | 0.027   |
| Histology             | NST              | 43     | 0.002   |
|                       | Others -         | 19     |         |
|                       | ILC              | 0      |         |
|                       | Mucinous         | 11     |         |
|                       | IMPC             | 5      |         |
|                       | ICC              | 2      |         |
|                       | Tubular          | 1      |         |
|                       | Apocrine         | 0      |         |
|                       | Medullary        | 0      |         |
|                       | Squamous         | 0      |         |
| pT, mean, mm          | 27.2             | 27.6   | 0.873   |
| pN                    | Positive         | 19     | 0.118   |
|                       | Negative         | 41     |         |
| Tumour grade          | High             | 10     | 0.275   |
|                       | Intermediate/low | 48     |         |
| Ki67 L.I., mean,%     | 34.3             | 32.6   | 0.604   |
| ER                    | Positive         | 62     | 0.499   |
|                       | Negative         | 0      |         |
| PgR                   | Positive         | 56     | 0.774   |
|                       | Negative         | 6      |         |
| Adjuvant chemotherapy | Yes              | 18     | 0.416   |
|                       | No               | 44     |         |

*MUC1* mucin 1, *TMA* tissue-microarray, *Ap* apical, *NST* no special type, *ILC* invasive lobular carcinoma, *IMPC* invasive micropapillary carcinoma, *ICC* invasive cribriform carcinoma, *L.I.* labelling index, *ER* estrogen receptor, *PgR* progesterone receptor
